# Supplementary material
Source: Research Square preprint supplement (doi:10.21203/rs.3.rs-9679851/v1)
Supplement: Supplementary file 1 [file 91b2523866af0bc37e0e6025.docx]

| Primer Name | sequence |
| --- | --- |
| *CD163 Forward Primer* | TCT GGC TTG ACA GCG TTT C |
| *CD163 Reverse Primer* | TGT GTT TGT TGC CTG GAT T |
| *DCN Forward Primer* | ATG AAG GCC ACT ATC ATC CTC C |
| *DCN Reverse Primer* | GTC GCG GTC ATC AGG AAC TT |
| *CD206 Forward Primer* | CGT TTA CCA AAT GGC TTC GT |
| *CD206 Reverse Primer* | CCT TGG CTT CGT GAT TTC AT |
| *IL-10 Forward Primer* | ACC TGC CTA ACA TGC TTC GAG |
| *IL-10 Reverse Primer* | CTG GGT CTT GGT TCT CAG CTT |
| *TGF-β Forward Primer* | GGC CAG ATC CTG TCC AAG C |
| *TGF-β Reverse Primer* | GTG GGT TTC CAC CAT TAG CAC |
| *GAPDH Forward Primer* | ACA ACT TTG GTA TCG TGG AAG G |
| *GAPDH Reverse Primer* | GCC ATC ACG CCA CAG TTT C |
| *Dcn Forward Primer (Mus)* | TCT TGG GCT GGA CCA TTT GAA |
| *Dcn Reverse Primer (Mus)* | CAT CGG TAG GGG CAC ATA GA |
| *Ccl2 Forward Primer (Mus)* | TTA AAA ACC TGG ATC GGA ACC AA |
| *Ccl2 Reverse Primer (Mus)* | GCA TTA GCT TCA GAT TTA CGG GT |
| *Jak2 Forward Primer (Mus)* | GGA ATG GCC TGC CTT ACA ATG |
| *Jak2 Reverse Primer (Mus)* | TGG CTC TAT CTG CTT CAC AGA AT |
| *Stat3 Forward Primer (Mus)* | CAA TAC CAT TGA CCT GCC GAT |
| *Stat3 Reverse Primer (Mus)* | GAG CGA CTC AAA CTG CCC T |
| *Gapdh Forward Primer (Mus)* | AGG TCG GTG TGA ACG GAT TTG |
| *Gapdh Reverse Primer (Mus)* | TGT AGA CCA TGT AGT TGA GGT CA |

**Supplymental Figure Legends:**


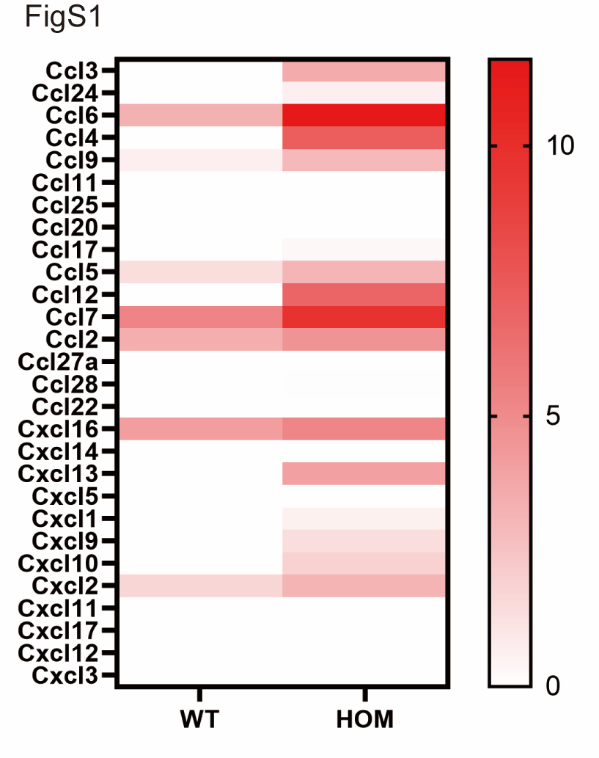


FigS1: Differential expression analysis of chemokine family genes at the transcriptional level.


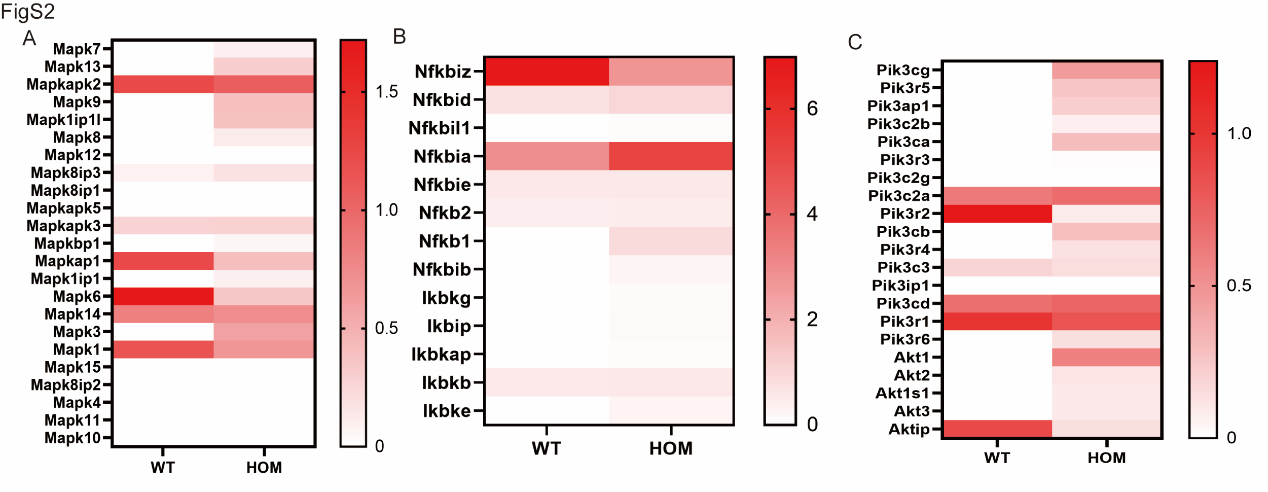


FigS2: Differences in transcription levels of chemokine family signaling pathways between the HOM group and the WT group; A. Changes in transcription levels of the MAPK signaling pathway; B. Changes in transcription levels of the NF-κB signaling pathway; C. Changes in transcription levels of the JAK-STAT signaling pathway.


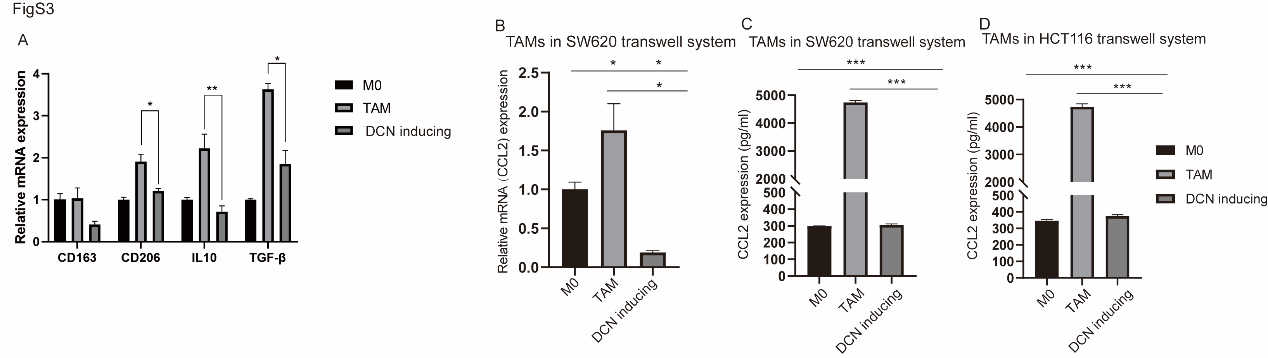


FigS3: A. Expression of M2-type TAM markers after exogenous DCN addition; B. qPCR analysis of changes in CCL2 transcription levels in TAMs induced by SW620 after exogenous DCN addition; C. The effect of exogenous DCN addition on CCL2 protein secretion levels in SW620 co-cultured TAMs; D. The effect of exogenous DCN addition on CCL2 protein secretion levels in HCT116 co-cultured TAMs; "*" indicates P < 0.05, "**" indicates P < 0.01, and "***" indicates P < 0.001;


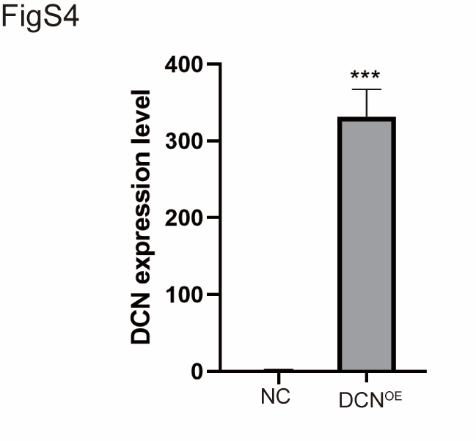


FigS4. qPCR was used to detect DCN expression in THP-1 cells transfected with lentivirus; "***" indicates P < 0.001.


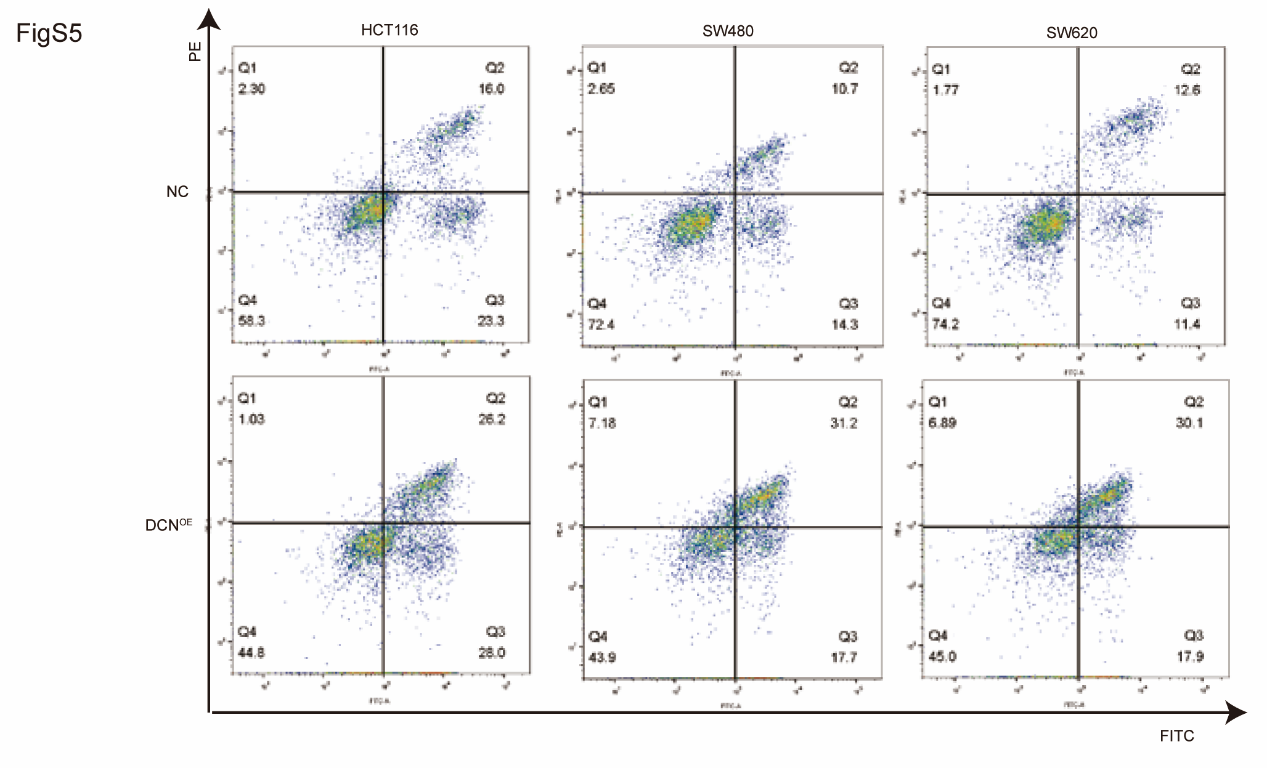


FigS5. Changes in apoptosis of colorectal cancer cells co-cultured with TAMs overexpressing DCN.


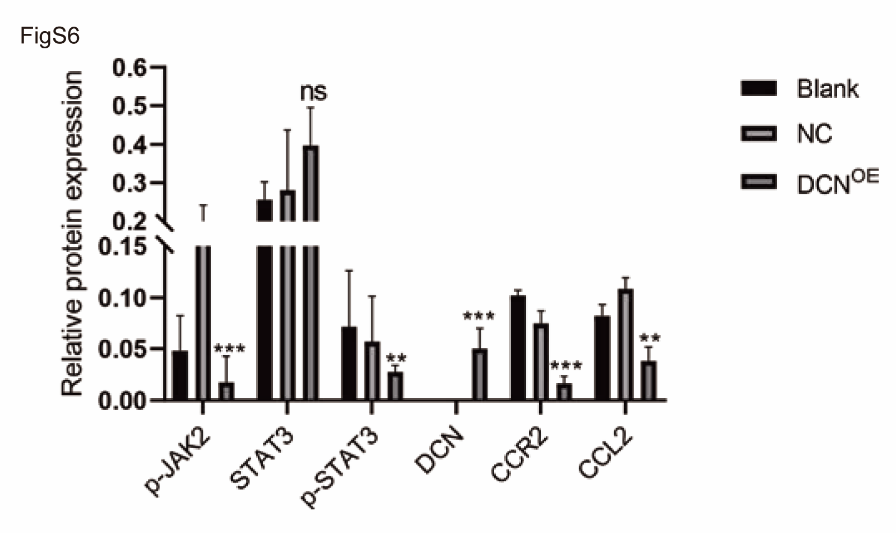


FigS6. Statistical analysis of Changes in JAK/STAT3 phosphorylation levels and CCL2/CCR2 protein levels in DCN-overexpressing TAM "*" indicates P < 0.05, "**" indicates P < 0.01, and "***" indicates P < 0.001.


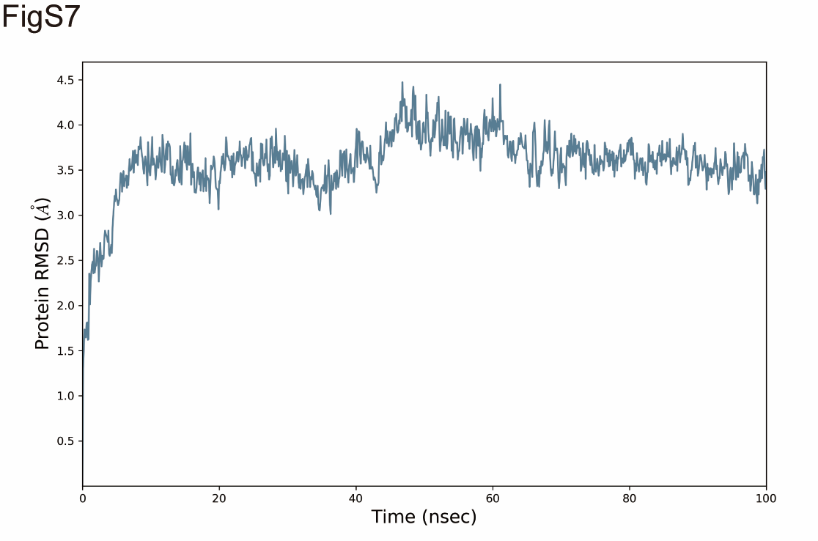


FigS7. Analysis of the interaction mechanism between DCN and TLR2.


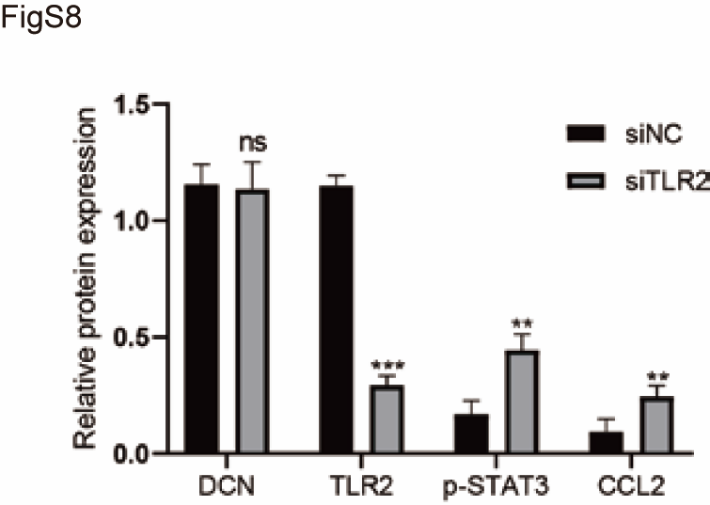


FigS8. Statistical analysis of western blot analysis detecting changes in STAT3 phosphorylation levels and CCL2 protein levels following TLR2 knockout; "*" indicates P < 0.05, "**" indicates P < 0.01, and "***" indicates P < 0.001.


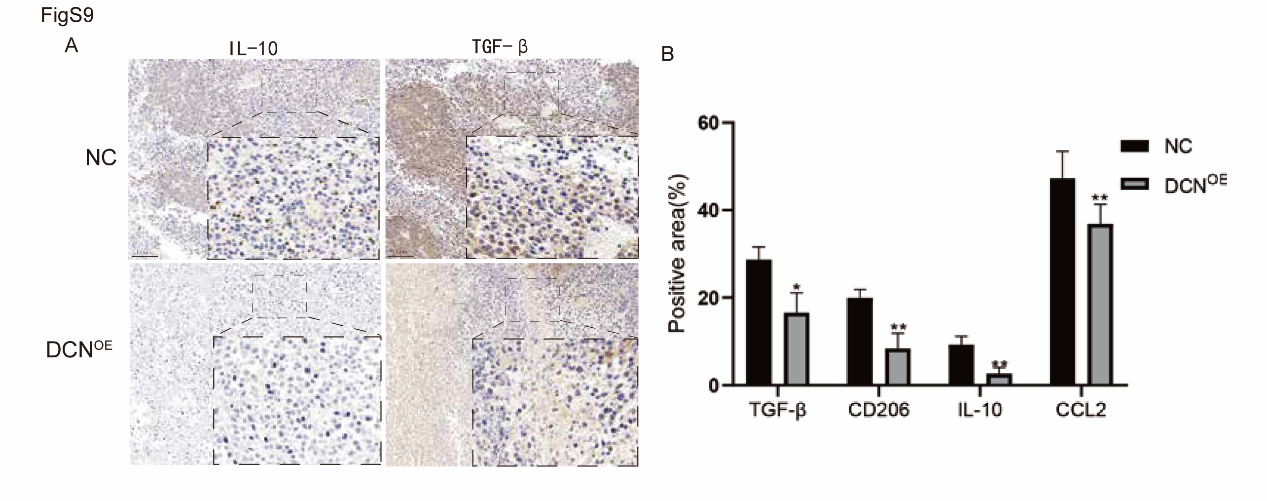


FigS9.A. Changes in tissue-resident M2-type TAM markers following DCN lentivirus treatment; B. Statistical analysis; "*" indicates P < 0.05, "**" indicates P < 0.01, and "***" indicates P < 0.001.


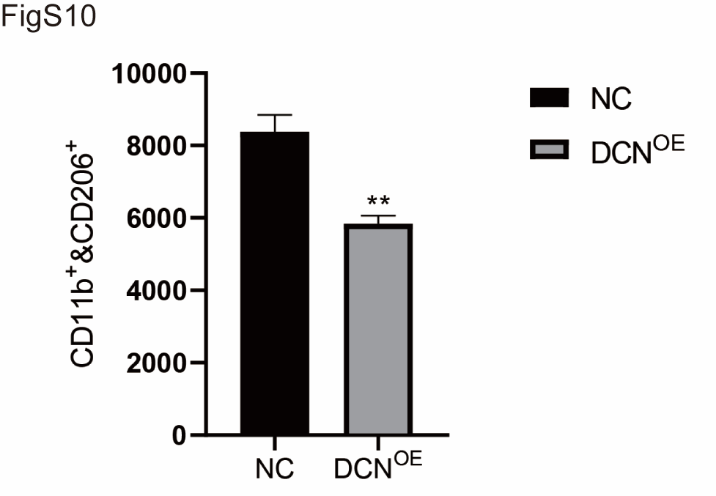


FigS10. Statistical analysis of changes in the proportion of M2-type TAMs following DCN lentivirus treatment. "*" indicates P < 0.05, "**" indicates P < 0.01, and "***" indicates P < 0.001.


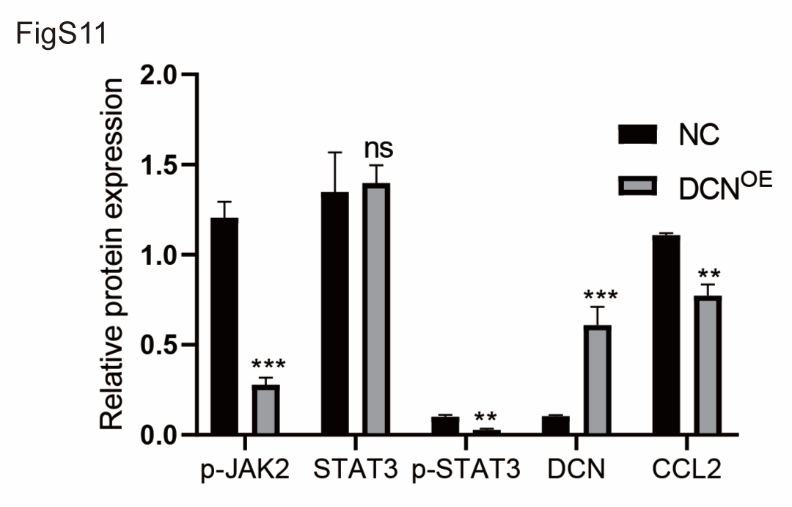


FigS11. Statistical analysis of western blot was used to detect changes in the expression of DCN, CCL2, and the JAK2-STAT3 signaling pathway in mouse M2-type TAMs; "*" indicates P < 0.05, "**" indicates P < 0.01, and "***" indicates P < 0.001.


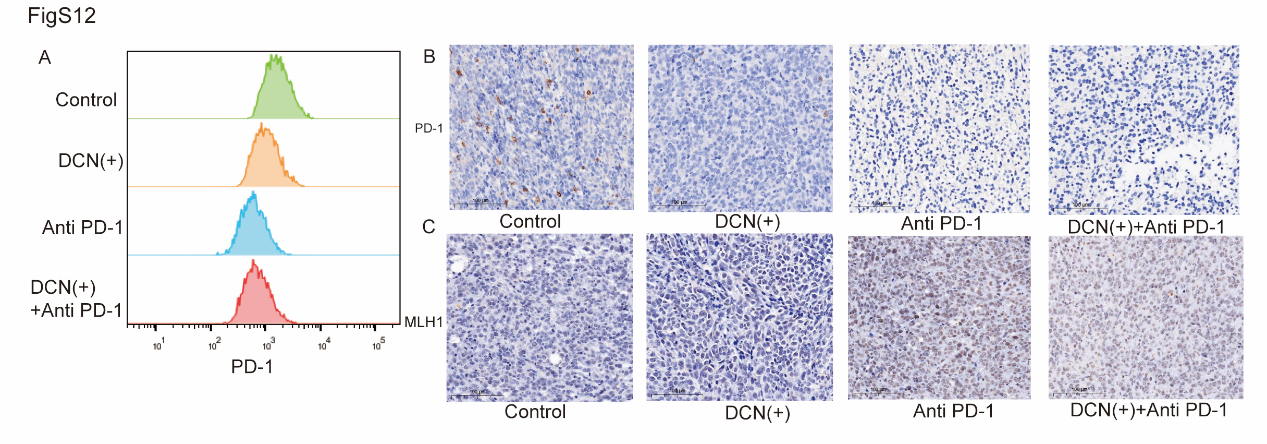


FigS12. A. Flow cytometry was used to detect the effect of PD-1 immune checkpoint inhibitors on TAMs in mouse tumor tissue; B. Immunohistochemistry was used to detect the expression of PD-1 in tissues after treatment with PD-1 immune checkpoint inhibitors ;C. Immunohistochemistry was used to detect the expression of MLH1 in tissues after treatment with PD-1 immune checkpoint inhibitors.


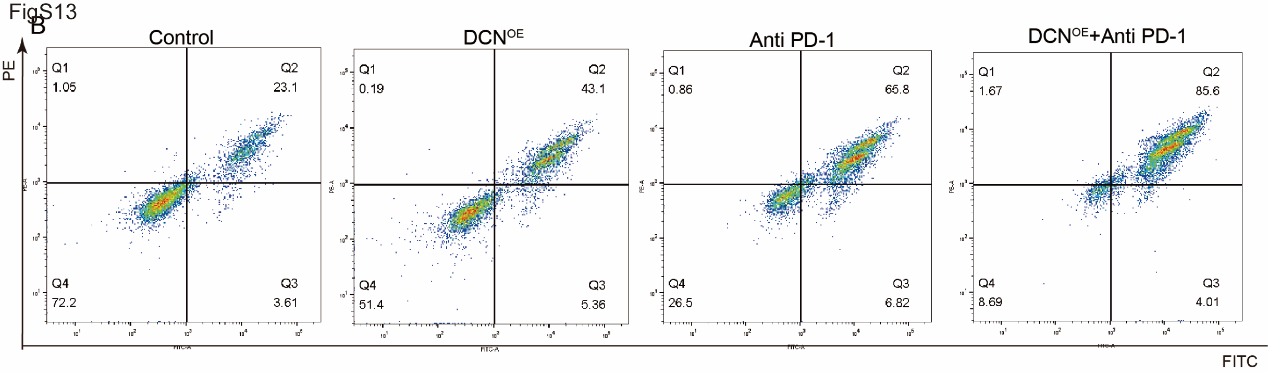


FigS13. Flow cytometry was used to detect the effect of combined treatment with PD-1 immune checkpoint inhibitors and DCN lentiviral vector on apoptosis of mouse tumor cells.


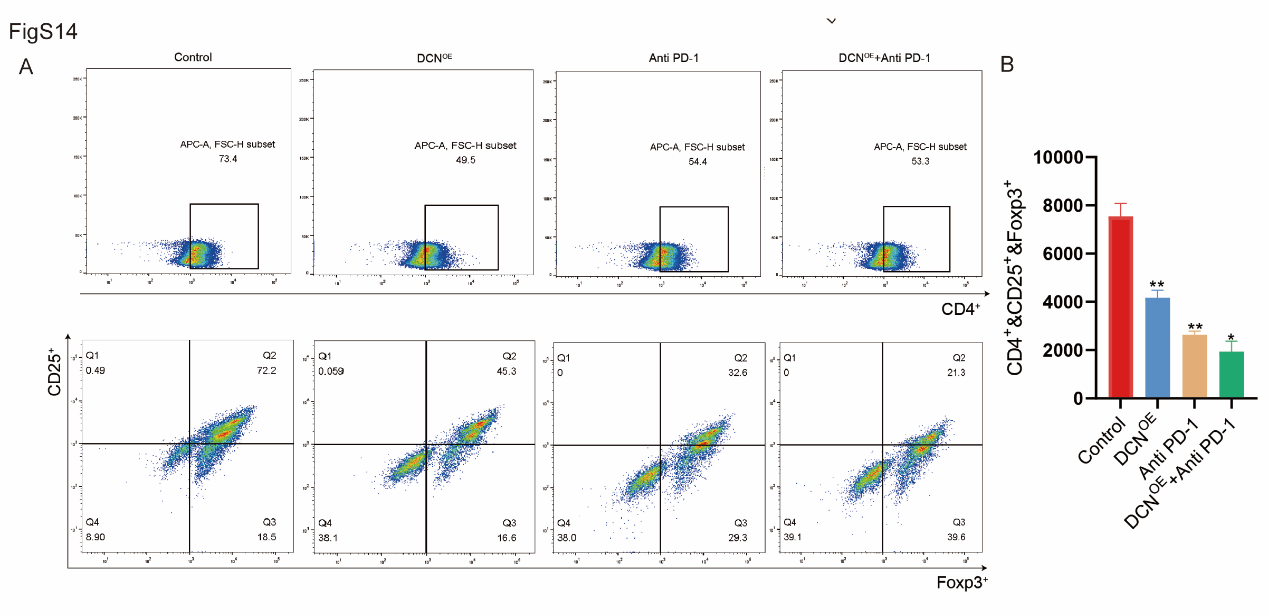


FigS14. Flow cytometry analysis of changes in Treg cell proportion after combined treatment with DCN lentivirus and PD-1 immune checkpoint inhibitor; "*" indicates P < 0.05, "**" indicates P < 0.01, and "***" indicates P < 0.001.

DCN Lentiviral Overexpression Vector Sequence (Lowercase section represents the target gene)：

ACGCGTGTAGTCTTATGCAATACTCTTGTAGTCTTGCAACATGGTAACGATGAGTTAGCAACATGCCTTACAAGGAGAGAAAAAGCACCGTGCATGCCGATTGGTGGAAGTAAGGTGGTACGATCGTGCCTTATTAGGAAGGCAACAGACGGGTCTGACATGGATTGGACGAACCACTGAATTGCCGCATTGCAGAGATATTGTATTTAAGTGCCTAGCTCGATACAATAAACGGGTCTCTCTGGTTAGACCAGATCTGAGCCTGGGAGCTCTCTGGCTAACTAGGGAACCCACTGCTTAAGCCTCAATAAAGCTTGCCTTGAGTGCTTCAAGTAGTGTGTGCCCGTCTGTTGTGTGACTCTGGTAACTAGAGATCCCTCAGACCCTTTTAGTCAGTGTGGAAAATCTCTAGCAGTGGCGCCCGAACAGGGACCTGAAAGCGAAAGGGAAACCAGAGCTCTCTCGACGCAGGACTCGGCTTGCTGAAGCGCGCACGGCAAGAGGCGAGGGGCGGCGACTGGTGAGTACGCCAAAAATTTTGACTAGCGGAGGCTAGAAGGAGAGAGATGGGTGCGAGAGCGTCAGTATTAAGCGGGGGAGAATTAGATCGCGATGGGAAAAAATTCGGTTAAGGCCAGGGGGAAAGAAAAAATATAAATTAAAACATATAGTATGGGCAAGCAGGGAGCTAGAACGATTCGCAGTTAATCCTGGCCTGTTAGAAACATCAGAAGGCTGTAGACAAATACTGGGACAGCTACAACCATCCCTTCAGACAGGATCAGAAGAACTTAGATCATTATATAATACAGTAGCAACCCTCTATTGTGTGCATCAAAGGATAGAGATAAAAGACACCAAGGAAGCTTTAGACAAGATAGAGGAAGAGCAAAACAAAAGTAAGACCACCGCACAGCAAGCGGCCACTGATCTTCAGACCTGGAGGAGGAGATATGAGGGACAATTGGAGAAGTGAATTATATAAATATAAAGTAGTAAAAATTGAACCATTAGGAGTAGCACCCACCAAGGCAAAGAGAAGAGTGGTGCAGAGAGAAAAAAGAGCAGTGGGAATAGGAGCTTTGTTCCTTGGGTTCTTGGGAGCAGCAGGAAGCACTATGGGCGCAGCCTCAATGACGCTGACGGTACAGGCCAGACAATTATTGTCTGGTATAGTGCAGCAGCAGAACAATTTGCTGAGGGCTATTGAGGCGCAACAGCATCTGTTGCAACTCACAGTCTGGGGCATCAAGCAGCTCCAGGCAAGAATCCTGGCTGTGGAAAGATACCTAAAGGATCAACAGCTCCTGGGGATTTGGGGTTGCTCTGGAAAACTCATTTGCACCACTGCTGTGCCTTGGAATGCTAGTTGGAGTAATAAATCTCTGGAACAGATTGGAATCACACGACCTGGATGGAGTGGGACAGAGAAATTAACAATTACACAAGCTTAATACACTCCTTAATTGAAGAATCGCAAAACCAGCAAGAAAAGAATGAACAAGAATTATTGGAATTAGATAAATGGGCAAGTTTGTGGAATTGGTTTAACATAACAAATTGGCTGTGGTATATAAAATTATTCATAATGATAGTAGGAGGCTTGGTAGGTTTAAGAATAGTTTTTGCTGTACTTTCTATAGTGAATAGAGTTAGGCAGGGATATTCACCATTATCGTTTCAGACCCACCTCCCAACCCCGAGGGGACCCGACAGGCCCGAAGGAATAGAAGAAGAAGGTGGAGAGAGAGACAGAGACAGATCCATTCGATTAGTGAACGGATCTCGACGGTATCGGTTAACTTTTAAAAGAAAAGGGGGGATTGGGGGGTACAGTGCAGGGGAAAGAATAGTAGACATAATAGCAACAGACATACAAACTAAAGAATTACAAAAACAAATTACAAAATTCAAAATTTTATCGATACTAGTATTATGCCCAGTACATGACCTTATGGGACTTTCCTACTTGGCAGTACATCTACGTATTAGTCATCGCTATTACCATGGTGATGCGGTTTTGGCAGTACATCAATGGGCGTGGATAGCGGTTTGACTCACGGGGATTTCCAAGTCTCCACCCCATTGACGTCAATGGGAGTTTGTTTTGGCACCAAAATCAACGGGACTTTCCAAAATGTCGTAACAACTCCGCCCCATTGACGCAAATGGGCGGTAGGCGTGTACGGTGGGAGGTTTATATAAGCAGAGCTCGTTTAGTGAACCGTCAGATCGCCTGGAGACGCCATCCACGCTGTTTTGACCTCCATAGAAGATTCTAGAGCTAGCGAATTCGCCACCatgaaggccactatcatcctccttctgcttgcacaagtttcctgggctggaccgtttcaacagagaggcttatttgactttatgctagaagatgaggcttctgggataggcccagaagttcctgatgaccgcgacttcgagccctccctaggcccagtgtgccccttccgctgtcaatgccatcttcgagtggtccagtgttctgatttgggtctggacaaagtgccaaaggatcttccccctgacacaactctgctagacctgcaaaacaacaaaataaccgaaatcaaagatggagactttaagaacctgaagaaccttcacgcattgattcttgtcaacaataaaattagcaaagttagtcctggagcatttacacctttggtgaagttggaacgactttatctgtccaagaatcagctgaaggaattgccagaaaaaatgcccaaaactcttcaggagctgcgtgcccatgagaatgagatcaccaaagtgcgaaaagttactttcaatggactgaaccagatgattgtcatagaactgggcaccaatccgctgaagagctcaggaattgaaaatggggctttccagggaatgaagaagctctcctacatccgcattgctgataccaatatcaccagcattcctcaaggtcttcctccttcccttacggaattacatcttgatggcaacaaaatcagcagagttgatgcagctagcctgaaaggactgaataatttggctaagttgggattgagtttcaacagcatctctgctgttgacaatggctctctggccaacacgcctcatctgagggagcttcacttggacaacaacaagcttaccagagtacctggtgggctggcagagcataagtacatccaggttgtctaccttcataacaacaatatctctgtagttggatcaagtgacttctgcccacctggacacaacaccaaaaaggcttcttattcgggtgtgagtcttttcagcaacccggtccagtactgggagatacagccatccaccttcagatgtgtctacgtgcgctctgccattcaactcggaaactataagGGATCCGACTACAAAGACCATGACGGTGATTATAAAGATCATGACATCGACTACAAGGATGACGATGACAAGTAGTGAGCGGCCGCGAAGGATCTGCGATCGCTCCGGTGCCCGTCAGTGGGCAGAGCGCACATCGCCCACAGTCCCCGAGAAGTTGGGGGGAGGGGTCGGCAATTGAACGGGTGCCTAGAGAAGGTGGCGCGGGGTAAACTGGGAAAGTGATGTCGTGTACTGGCTCCGCCTTTTTCCCGAGGGTGGGGGAGAACCGTATATAAGTGCAGTAGTCGCCGTGAACGTTCTTTTTCGCAACGGGTTTGCCGCCAGAACACAGCTGAAGCTTCGAGGGGCTCGCATCTCTCCTTCACGCGCCCGCCGCCCTACCTGAGGCCGCCATCCACGCCGGTTGAGTCGCGTTCTGCCGCCTCCCGCCTGTGGTGCCTCCTGAACTGCGTCCGCCGTCTAGGTAAGTTTAAAGCTCAGGTCGAGACCGGGCCTTTGTCCGGCGCTCCCTTGGAGCCTACCTAGACTCAGCCGGCTCTCCACGCTTTGCCTGACCCTGCTTGCTCAACTCTACGTCTTTGTTTCGTTTTCTGTTCTGCGCCGTTACAGATCCAAGCTGTGACCGGCGCCTACGCTAGACGCCACCATGGAGAGCGACGAGAGCGGCCTGCCCGCCATGGAGATCGAGTGCCGCATCACCGGCACCCTGAACGGCGTGGAGTTCGAGCTGGTGGGCGGCGGAGAGGGCACCCCCAAGCAGGGCCGCATGACCAACAAGATGAAGAGCACCAAAGGCGCCCTGACCTTCAGCCCCTACCTGCTGAGCCACGTGATGGGCTACGGCTTCTACCACTTCGGCACCTACCCCAGCGGCTACGAGAACCCCTTCCTGCACGCCATCAACAACGGCGGCTACACCAACACCCGCATCGAGAAGTACGAGGACGGCGGCGTGCTGCACGTGAGCTTCAGCTACCGCTACGAGGCCGGCCGCGTGATCGGCGACTTCAAGGTGGTGGGCACCGGCTTCCCCGAGGACAGCGTGATCTTCACCGACAAGATCATCCGCAGCAACGCCACCGTGGAGCACCTGCACCCCATGGGCGATAACGTGCTGGTGGGCAGCTTCGCCCGCACCTTCAGCCTGCGCGACGGCGGCTACTACAGCTTCGTGGTGGACAGCCACATGCACTTCAAGAGCGCCATCCACCCCAGCATCCTGCAGAACGGGGGCCCCATGTTCGCCTTCCGCCGCGTGGAGGAGCTGCACAGCAACACCGAGCTGGGCATCGTGGAGTACCAGCACGCCTTCAAGACCCCCATCGCCTTCGCCAGATCCCGCGCTCAGTCGTCCAATTCTGCCGTGGACGGCACCGCCGGACCCGGCTCCACCGGATCTCGCGAGGGCAGAGGAAGTCTTCTAACATGCGGTGACGTGGAGGAGAATCCCGGCCCTATGACCGAGTACAAGCCCACGGTGCGCCTCGCCACCCGCGACGACGTCCCCAGGGCCGTACGCACCCTCGCCGCCGCGTTCGCCGACTACCCCGCCACGCGCCACACCGTCGATCCGGACCGCCACATCGAGCGGGTCACCGAGCTGCAAGAACTCTTCCTCACGCGCGTCGGGCTCGACATCGGCAAGGTGTGGGTCGCGGACGACGGCGCCGCGGTGGCGGTCTGGACCACGCCGGAGAGCGTCGAAGCGGGGGCGGTGTTCGCCGAGATCGGCCCGCGCATGGCCGAGTTGAGCGGTTCCCGGCTGGCCGCGCAGCAACAGATGGAAGGCCTCCTGGCGCCGCACCGGCCCAAGGAGCCCGCGTGGTTCCTGGCCACCGTCGGCGTCTCGCCCGACCACCAGGGCAAGGGTCTGGGCAGCGCCGTCGTGCTCCCCGGAGTGGAGGCGGCCGAGCGCGCCGGGGTGCCCGCCTTCCTGGAGACCTCCGCGCCCCGCAACCTCCCCTTCTACGAGCGGCTCGGCTTCACCGTCACCGCCGACGTCGAGGTGCCCGAAGGACCGCGCACCTGGTGCATGACCCGCAAGCCCGGTGCCTGAAATCAACCTCTGGATTACAAAATTTGTGAAAGATTGACTGGTATTCTTAACTATGTTGCTCCTTTTACGCTATGTGGATACGCTGCTTTAATGCCTTTGTATCATGCTATTGCTTCCCGTATGGCTTTCATTTTCTCCTCCTTGTATAAATCCTGGTTGCTGTCTCTTTATGAGGAGTTGTGGCCCGTTGTCAGGCAACGTGGCGTGGTGTGCACTGTGTTTGCTGACGCAACCCCCACTGGTTGGGGCATTGCCACCACCTGTCAGCTCCTTTCCGGGACTTTCGCTTTCCCCCTCCCTATTGCCACGGCGGAACTCATCGCCGCCTGCCTTGCCCGCTGCTGGACAGGGGCTCGGCTGTTGGGCACTGACAATTCCGTGGTGTTGTCGGGGAAATCATCGTCCTTTCCTTGGCTGCTCGCCTGTGTTGCCACCTGGATTCTGCGCGGGACGTCCTTCTGCTACGTCCCTTCGGCCCTCAATCCAGCGGACCTTCCTTCCCGCGGCCTGCTGCCGGCTCTGCGGCCTCTTCCGCGTCTTCGCCTTCGCCCTCAGACGAGTCGGATCTCCCTTTGGGCCGCCTCCCCGCCTGGTACCTTTAAGACCAATGACTTACAAGGCAGCTGTAGATCTTAGCCACTTTTTAAAAGAAAAGGGGGGACTGGAAGGGCTAATTCACTCCCAACGAAAATAAGATCTGCTTTTTGCTTGTACTGGGTCTCTCTGGTTAGACCAGATCTGAGCCTGGGAGCTCTCTGGCTAACTAGGGAACCCACTGCTTAAGCCTCAATAAAGCTTGCCTTGAGTGCTTCAAGTAGTGTGTGCCCGTCTGTTGTGTGACTCTGGTAACTAGAGATCCCTCAGACCCTTTTAGTCAGTGTGGAAAATCTCTAGCAGTAGTAGTTCATGTCATCTTATTATTCAGTATTTATAACTTGCAAAGAAATGAATATCAGAGAGTGAGAGGAACTTGTTTATTGCAGCTTATAATGGTTACAAATAAAGCAATAGCATCACAAATTTCACAAATAAAGCATTTTTTTCACTGCATTCTAGTTGTGGTTTGTCCAAACTCATCAATGTATCTTATCATGTCTGGCTCTAGCTATCCCGCCCCTAACTCCGCCCAGTTCCGCCCATTCTCCGCCCCATGGCTGACTAATTTTTTTTATTTATGCAGAGGCCGAGGCCGCCTCGGCCTCTGAGCTATTCCAGAAGTAGTGAGGAGGCTTTTTTGGAGGCCTAGACTTTTGCAGAGACGGCCCAAATTCGTAATCATGGTCATAGCTGTTTCCTGTGTGAAATTGTTATCCGCTCACAATTCCACACAACATACGAGCCGGAAGCATAAAGTGTAAAGCCTGGGGTGCCTAATGAGTGAGCTAACTCACATTAATTGCGTTGCGCTCACTGCCCGCTTTCCAGTCGGGAAACCTGTCGTGCCAGCTGCATTAATGAATCGGCCAACGCGCGGGGAGAGGCGGTTTGCGTATTGGGCGCTCTTCCGCTTCCTCGCTCACTGACTCGCTGCGCTCGGTCGTTCGGCTGCGGCGAGCGGTATCAGCTCACTCAAAGGCGGTAATACGGTTATCCACAGAATCAGGGGATAACGCAGGAAAGAACATGTGAGCAAAAGGCCAGCAAAAGGCCAGGAACCGTAAAAAGGCCGCGTTGCTGGCGTTTTTCCATAGGCTCCGCCCCCCTGACGAGCATCACAAAAATCGACGCTCAAGTCAGAGGTGGCGAAACCCGACAGGACTATAAAGATACCAGGCGTTTCCCCCTGGAAGCTCCCTCGTGCGCTCTCCTGTTCCGACCCTGCCGCTTACCGGATACCTGTCCGCCTTTCTCCCTTCGGGAAGCGTGGCGCTTTCTCATAGCTCACGCTGTAGGTATCTCAGTTCGGTGTAGGTCGTTCGCTCCAAGCTGGGCTGTGTGCACGAACCCCCCGTTCAGCCCGACCGCTGCGCCTTATCCGGTAACTATCGTCTTGAGTCCAACCCGGTAAGACACGACTTATCGCCACTGGCAGCAGCCACTGGTAACAGGATTAGCAGAGCGAGGTATGTAGGCGGTGCTACAGAGTTCTTGAAGTGGTGGCCTAACTACGGCTACACTAGAAGGACAGTATTTGGTATCTGCGCTCTGCTGAAGCCAGTTACCTTCGGAAAAAGAGTTGGTAGCTCTTGATCCGGCAAACAAACCACCGCTGGTAGCGGTGGTTTTTTTGTTTGCAAGCAGCAGATTACGCGCAGAAAAAAAGGATCTCAAGAAGATCCTTTGATCTTTTCTACGGGGTCTGACGCTCAGTGGAACGAAAACTCACGTTAAGGGATTTTGGTCATGAGATTATCAAAAAGGATCTTCACCTAGATCCTTTTAAATTAAAAATGAAGTTTTAAATCAATCTAAAGTATATATGAGTAAACTTGGTCTGACAGTTACCAATGCTTAATCAGTGAGGCACCTATCTCAGCGATCTGTCTATTTCGTTCATCCATAGTTGCCTGACTCCCCGTCGTGTAGATAACTACGATACGGGAGGGCTTACCATCTGGCCCCAGTGCTGCAATGATACCGCGAGACCCACGCTCACCGGCTCCAGATTTATCAGCAATAAACCAGCCAGCCGGAAGGGCCGAGCGCAGAAGTGGTCCTGCAACTTTATCCGCCTCCATCCAGTCTATTAATTGTTGCCGGGAAGCTAGAGTAAGTAGTTCGCCAGTTAATAGTTTGCGCAACGTTGTTGCCATTGCTACAGGCATCGTGGTGTCACGCTCGTCGTTTGGTATGGCTTCATTCAGCTCCGGTTCCCAACGATCAAGGCGAGTTACATGATCCCCCATGTTGTGCAAAAAAGCGGTTAGCTCCTTCGGTCCTCCGATCGTTGTCAGAAGTAAGTTGGCCGCAGTGTTATCACTCATGGTTATGGCAGCACTGCATAATTCTCTTACTGTCATGCCATCCGTAAGATGCTTTTCTGTGACTGGTGAGTACTCAACCAAGTCATTCTGAGAATAGTGTATGCGGCGACCGAGTTGCTCTTGCCCGGCGTCAATACGGGATAATACCGCGCCACATAGCAGAACTTTAAAAGTGCTCATCATTGGAAAACGTTCTTCGGGGCGAAAACTCTCAAGGATCTTACCGCTGTTGAGATCCAGTTCGATGTAACCCACTCGTGCACCCAACTGATCTTCAGCATCTTTTACTTTCACCAGCGTTTCTGGGTGAGCAAAAACAGGAAGGCAAAATGCCGCAAAAAAGGGAATAAGGGCGACACGGAAATGTTGAATACTCATACTCTTCCTTTTTCAATATTATTGAAGCATTTATCAGGGTTATTGTCTCATGAGCGGATACATATTTGAATGTATTTAGAAAAATAAACAAATAGGGGTTCCGCGCACATTTCCCCGAAAAGTGCCACCTGACGTCTAAGAAACCATTATTATCATGACATTAACCTATAAAAATAGGCGTATCACGAGGCCCTTTCGTCTCGCGCGTTTCGGTGATGACGGTGAAAACCTCTGACACATGCAGCTCCCGGAGACGGTCACAGCTTGTCTGTAAGCGGATGCCGGGAGCAGACAAGCCCGTCAGGGCGCGTCAGCGGGTGTTGGCGGGTGTCGGGGCTGGCTTAACTATGCGGCATCAGAGCAGATTGTACTGAGAGTGCACCATATGCGGTGTGAAATACCGCACAGATGCGTAAGGAGAAAATACCGCATCAGGCGCCATTCGCCATTCAGGCTGCGCAACTGTTGGGAAGGGCGATCGGTGCGGGCCTCTTCGCTATTACGCCAGCTGGCGAAAGGGGGATGTGCTGCAAGGCGATTAAGTTGGGTAACGCCAGGGTTTTCCCAGTCACGACGTTGTAAAACGACGGCCAGTGCCAAGCTG

Mrc1 promoter sequence:

ccgagctctgaaatggatgcttcaaggatttgaagagacaccagaagtgaaaaacgtgctattttcccacagttcctggcaatacaaagattgttttaaggcctatggaaattcctcttcctccgttacctgaaattacagatttgtgttgacttgctcacccctcctaacctgataaaatcttccaataagataaaaatgatggagacaaatcctttgtgggatgttggacttcactttatatcacatccagcgtctcgttactgattctgattttattcctgtgcatgtaagacacgttgacataataaaaccatggatatacagatgcctgcaattcagttaactcttttttttcctcttcaaataagtcaaagcaaaccccaattaggcaaaacaatttgaatggcttgcatttaaaagaccaattaaaacattttttggtcagcaagcatgatgggacacacttataatcccagctctcagaaagtcaaaacagaggaaccaagaattcaaggccagcctgcgctacaaacgcaagactgtttcggtgttcctgtgataagtcagttacgcagtgattgaaaaggaaacgtttgcagcctctcaccagttgtgggagaattttctttgtcagttaagccttgatagaatgaaaaagaacggtgggtcccttctcagaatcttcctaatttaggctttttaaaaagaaaattcttgagagaaaccacagcttattgggaaatgagtgtgtacctgcctcagcgtggatgggtctgaacagcttttcacttgaaggtaaaccatctgtttacaacttctaagtcgccagtgtttccagagcttctttttgaaacgatgacatttcccacgctccagtttcaggtcttccctgactaaccacaaatatccatttctaaatattcttaattcttgttgaacgtctggaaaaaaaaaatcagtgtttaggtgggttgtgtggtgctttgtgaacgaccctgcaaaatcatgaagacgaaaccccactgtcatcgaatcaacaagcaacttttggactcaagccaggctttcttttgcaagagagagagagaggtcttccctttttcaaactctgaggactgtaatggttgaggcctggcagcgaaccgacaacaaagctattgccactatttcctctggctttctaaggaaagctgctagaactttctatccctgggcttcattgaggttgtcttaaaattaacttctgtcattttccttctagagacaggggcaaaactctacgtgaaccatacctttgatcctttccaaggagtgtgtgtgtgtgtgtgtgtgtgtgtgtgtgtgtgtgtgtgtgtgtgtgttggtgctcgggctctaagcctgagcaggaagagcttctgatgctttccagcgagtgtcctccctttctgactgtagaattgtgggtgagagcctccacagctgcctcctggagactttttcccacccagataatggcctccgtttggttactgcccagcacctgtggagagctcagcagggctgcctctccctgctgctcatggcctgggtcctcacttctccccacttcctgcgttttctcctctcctacacatgttcctctctccccttcctcctgtgccttagcttacgaagcaaagttgtaactttgaattcctgtttttctaaccgcccccatgtgacaggatatctctcaattggagggttttcctaaattcaggagtcctttaaaagggacagcttcctctgtcctccttttcagtcaggcagctcccagaccttggactgagcaaaggggcaacctggggacctggttgtattctttgcctttcccagtctccctcttctccctcattggaagatccactctgggcc
